# Supplementary material for: A nanopore counter for highly sensitive evaluation of DNA methylation and its application in in vitro diagnostics
Source: Royal Society of Chemistry journal article supplement (doi:10.1039/d3an00035d), 2023-01-01
Supplement: d3an00035d4.pdf [file d3an00035d4.pdf]

## Supporting Information

### **Nanopore counter for highly sensitive evaluation of DNA methylation and application for in vitro diagnostics**

Jiahai Wang<sup>a</sup>, Lanfang Chen<sup>a</sup>, Cenlin Gui<sup>a</sup>, Jianji Zhu<sup>a</sup>, Baian Zhu<sup>a</sup>, Zhuobin Zhu<sup>a</sup>,  
and Daqi Chen<sup>a,\*</sup>

<sup>a</sup>*School of Mechanical and Electrical Engineering, School of Chemistry and Chemical  
Engineering, Guangzhou University, Guangzhou, 510006, China*

E-mail: [daqichen@gzhu.edu.cn](mailto:daqichen@gzhu.edu.cn); [jiahaiwang@gzhu.edu.cn](mailto:jiahaiwang@gzhu.edu.cn)

#### **Oligonucleotides**

**Table S1.** Oligonucleotides used in this study.

| Name                  | Sequence (5'→3')                                                                                                                                               |
|-----------------------|----------------------------------------------------------------------------------------------------------------------------------------------------------------|
| PUC57-<br>PUC57-SEPT9 | PUC57-<br>GATATCCGGCTAGCTCTGCACTGCAGGAGCGCGG<br>GCGCGGCGCCCCAGCCAGCGCGCAGGGCCCCGGG<br>CCCCGCCGGGGGCGCTTCCTCGCCGCTGCCCTCC<br>GCGCGACCCGCTGCCACCCAGCCATCATGTCGGA |

|                      |                                                                                                                                                                                                                                         |
|----------------------|-----------------------------------------------------------------------------------------------------------------------------------------------------------------------------------------------------------------------------------------|
|                      | <p>CCC <b>CGCG</b>GTCAAC <b>GCGC</b>AGCTGGATGGGATCATT</p> <p>TCGGACTTCGAAGGTGGGTGCTGGGCTGGCTGCT</p> <p>GCGGCCGCGGACGTGCTGGAGAGGACCCTGCGG</p> <p>GTGGGCCTGGCGCGGGACGGGGGTGCGCTGAGG</p> <p>GGAGACGGGAGTGCGCTGAGGGGAGACGGGACC</p> <p>C</p> |
| 317bp-Forward primer | ATGCATCTAGATATCCGGC                                                                                                                                                                                                                     |
| 317bp-Reverse primer | ATATCGGGTCCCGTCTCC                                                                                                                                                                                                                      |
| 406bp-Forward primer | GGAGAAAATACCGCATCAGGC                                                                                                                                                                                                                   |
| 406bp-Reverse primer | CCCAGCACCCACCTTCG                                                                                                                                                                                                                       |
| 806bp-Forward primer | CCTCTTCGCTATTACGCCAG                                                                                                                                                                                                                    |
| 806bp-Forward primer | ATTACCGCCTTTGAGTGAGC                                                                                                                                                                                                                    |

Note: Highlighted red sequence: The recognition sites of HhaI and BstUI endonucleases

## Supplementary figures

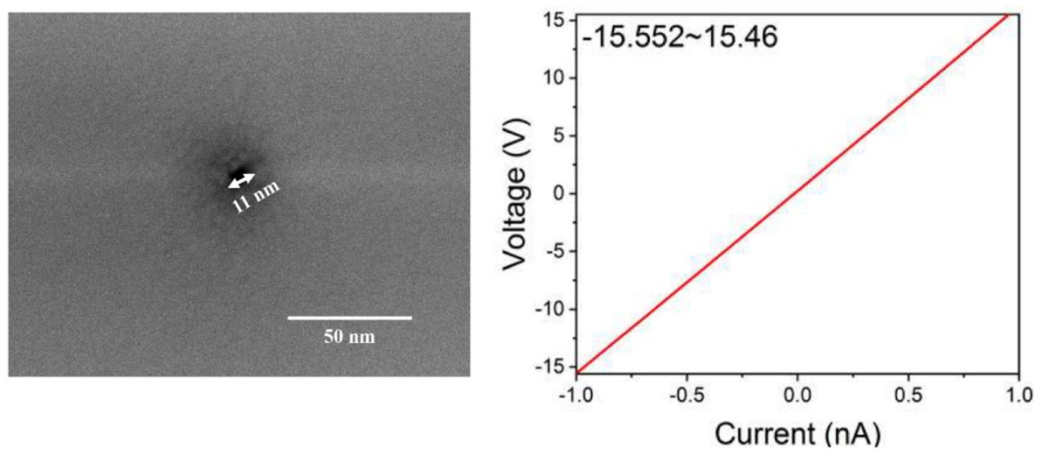

**Fig. S1** (a) Top view of SEM image of a typical glass nanopore. (b) I-V curve of a typical glass nanopore in the test buffer (4 M LiCl).

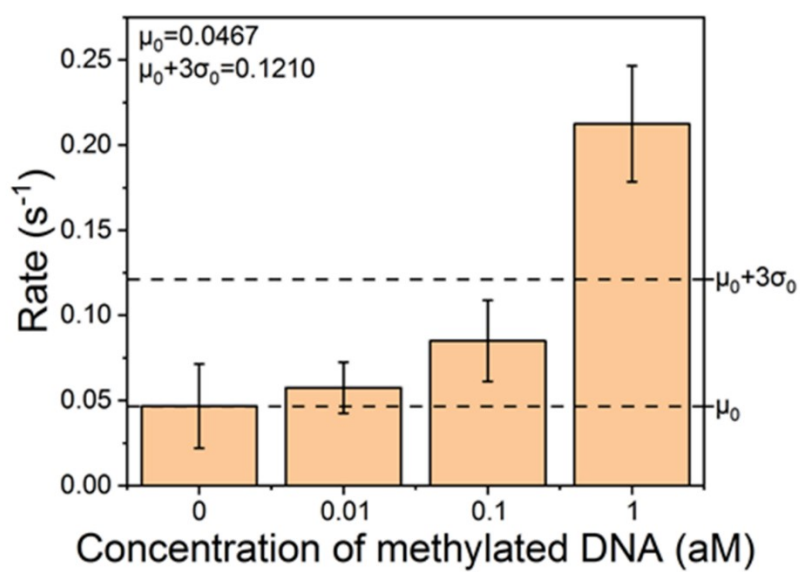

**Fig. S2** The noise level of the sensor with zero input and the calculation of the LOD of the sensor.

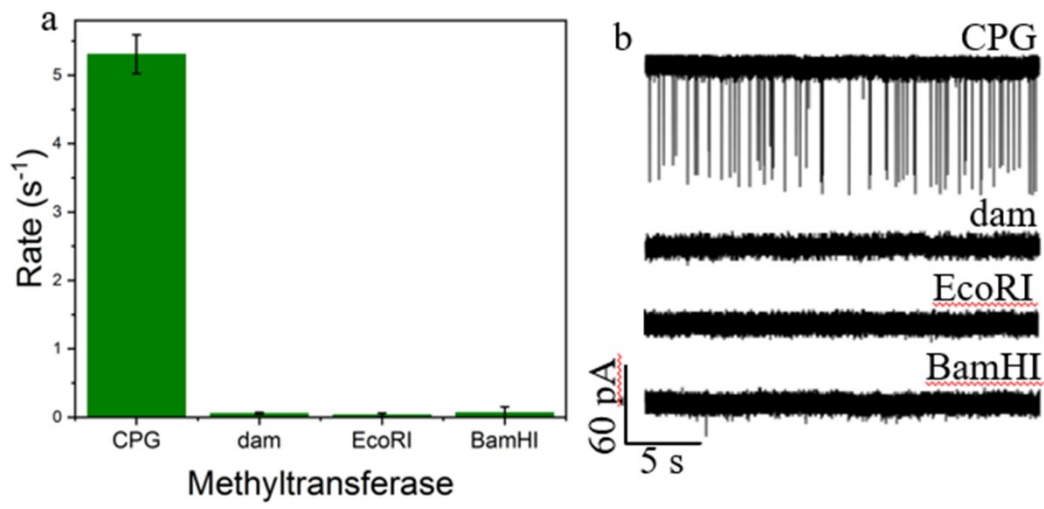

**Fig. S3** Performance of the sensor to other type of methylation. Only CpG methylation can generate the translocation signal, showing good selectivity.
