# Supplementary figures and images for: A nanopore counter for highly sensitive evaluation of DNA methylation and its application in in vitro diagnostics
Source: Royal Society of Chemistry journal article supplement (doi:10.1039/d3an00035d), 2023-01-01

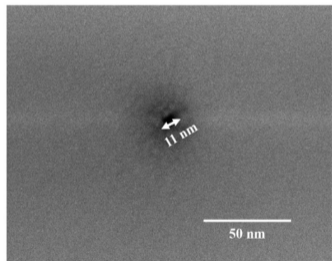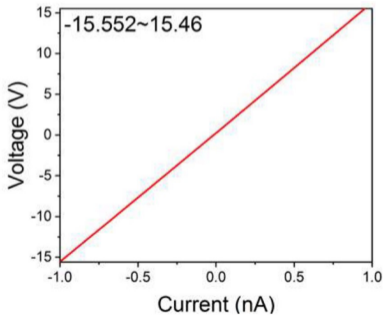

Supplement: d3an00035d1.pdf [file d3an00035d1.pdf]

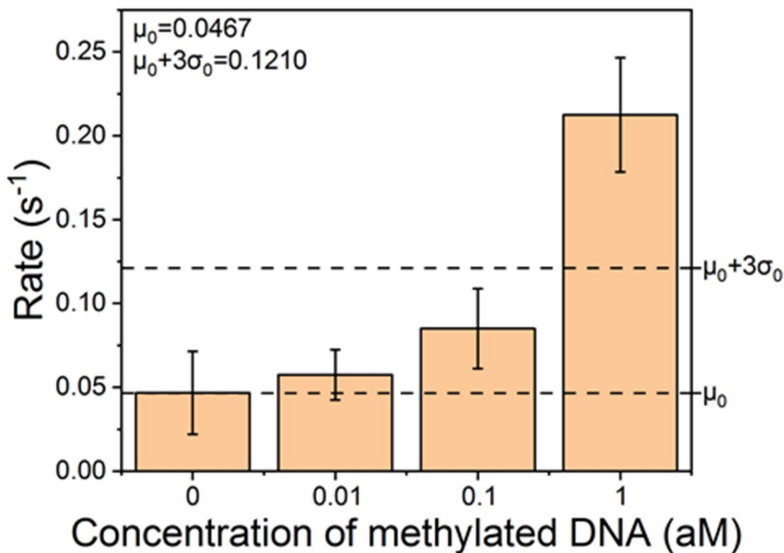

Supplement: d3an00035d2.pdf [file d3an00035d2.pdf]

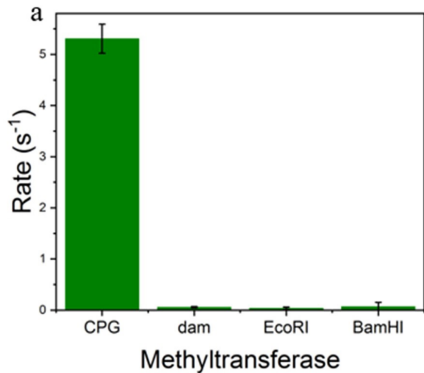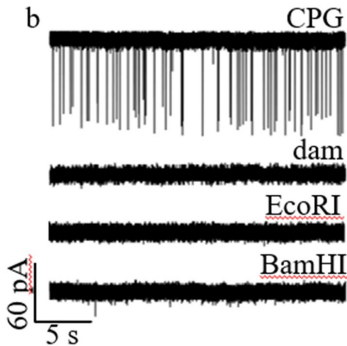

Supplement: d3an00035d3.pdf [file d3an00035d3.pdf]
